# Supplementary material for: Green Synthesis of Nano Zinc Oxide/Nanohydroxyapatite Composites Using Date Palm Pits Extract and Eggshells: Adsorption and Photocatalytic Degradation of Methylene Blue
Source: MDPI journal article supplement (doi:10.3390/nano12010049), 2021-12-24
Supplement: s1 [file s1]

# Supplementary materials

## Green Synthesis of Nano Zinc Oxide/Nanohydroxyapatite Composites Using Date Palm Pits Extract and Eggshells: Adsorption and Photocatalytic Degradation of Methylene Blue

Maha S. Elsayed <sup>1,\*</sup>, Inas A. Ahmed <sup>2</sup>, Dina M. D. Bader <sup>2</sup> and Asaad F. Hassan <sup>3</sup>

<sup>1</sup> Central Laboratory of Date Palm Research and Development, Agricultural Research Center, Giza 12619, Egypt

<sup>2</sup> Department of Chemistry, Faculty of Science, King Khalid University, Abha 62224, Saudi Arabia; eaahmed@kku.edu.sa (I.A.A.); ddeyaa@kku.edu.sa (D.M.D.B.)

<sup>3</sup> Chemistry Department, Faculty of Science, Damanhour University, Damanhour 22511, Egypt; asmz68@sci.dmu.edu.eg

\* Correspondence: mahasobhy1000@yahoo.com; Tel.: +20-106-257-8855

**Table S1.** GC-MS differentiation of the compounds detected in the date palm seeds extract

| Peak | RT     | Name                                                                             | Formula                                                        | Area      | Area Sum % |
|------|--------|----------------------------------------------------------------------------------|----------------------------------------------------------------|-----------|------------|
| 1    | 13.337 | Octadecane, 6-methyl-                                                            | C <sub>19</sub> H <sub>40</sub>                                | 3113268.1 | 0.64       |
| 2    | 13.767 | Decane, 2,3,5,8-tetramethyl-                                                     | C <sub>14</sub> H <sub>30</sub>                                | 4090752.6 | 0.83       |
| 3    | 14.083 | Butylated Hydroxytoluene                                                         | C <sub>15</sub> H <sub>24</sub> O                              | 13840947  | 2.82       |
| 4    | 14.43  | Benzoic acid, 3,5-bis(1,1-dimethylethyl)-4-hydroxy-, ethyl ester                 | C <sub>17</sub> H <sub>26</sub> O <sub>3</sub>                 | 7696635   | 1.57       |
| 5    | 15.575 | Dodecanoic acid, trimethylsilyl ester                                            | C <sub>15</sub> H <sub>32</sub> O <sub>2</sub> Si              | 41436959  | 8.46       |
| 6    | 16.185 | Tetradecane, 2,6,10-trimethyl-                                                   | C <sub>17</sub> H <sub>36</sub>                                | 3266406.7 | 0.67       |
| 7    | 17.384 | 9-Octadecenoic acid (Z)-                                                         | C <sub>18</sub> H <sub>34</sub> O <sub>2</sub>                 | 6094113.9 | 1.24       |
| 8    | 17.625 | Myristic acid, TMS derivative                                                    | C <sub>17</sub> H <sub>36</sub> O <sub>2</sub> Si              | 31837903  | 6.5        |
| 9    | 18.363 | Tetradecane, 2,6,10-trimethyl-                                                   | C <sub>17</sub> H <sub>36</sub>                                | 5402844.2 | 1.1        |
| 10   | 19.516 | Palmitic Acid, TMS derivative                                                    | C <sub>19</sub> H <sub>40</sub> O <sub>2</sub> Si              | 79002808  | 16.12      |
| 11   | 21.001 | 9,12-Octadecadienoic acid (Z,Z)-, TMS derivative                                 | C <sub>21</sub> H <sub>40</sub> O <sub>2</sub> Si              | 26696317  | 5.45       |
| 12   | 21.046 | 9-Octadecenoic acid, (E)-, TMS derivative                                        | C <sub>21</sub> H <sub>42</sub> O <sub>2</sub> Si              | 116682823 | 23.81      |
| 13   | 21.754 | 9,12,15-Octadecatrienoic acid, 2-(acetyloxy)-1-[(acetyloxy)methyl]ethyl ester, ( | C <sub>25</sub> H <sub>40</sub> O <sub>6</sub>                 | 3102104.6 | 0.63       |
| 14   | 22.553 | 9,12,15-Octadecatrienoic acid, 2-[[trimethylsilyl]oxy]-1-[[trimethylsilyl]oxy]m  | C <sub>27</sub> H <sub>52</sub> O <sub>4</sub> Si <sub>2</sub> | 5160684.2 | 1.05       |
| 15   | 23.728 | Di-n-octyl phthalate                                                             | C <sub>24</sub> H <sub>38</sub> O <sub>4</sub>                 | 17280429  | 3.53       |
| 16   | 24.022 | 1-Monopalmitin, 2TMS derivative                                                  | C <sub>25</sub> H <sub>54</sub> O <sub>4</sub> Si <sub>2</sub> | 9580733.8 | 1.96       |
| 17   | 25.243 | 1-Monooleoylglycerol, 2TMS derivative                                            | C <sub>27</sub> H <sub>56</sub> O <sub>4</sub> Si <sub>2</sub> | 14977367  | 3.06       |
| 18   | 27.383 | 13-Heptadecyn-1-ol                                                               | C <sub>17</sub> H <sub>32</sub> O                              | 2030498.9 | 0.41       |
| 19   | 27.873 | E-9-Tetradecenoic acid                                                           | C <sub>14</sub> H <sub>26</sub> O <sub>2</sub>                 | 4554852.5 | 0.93       |
| 20   | 28.174 | Dodecanoic acid, 3-hydroxy-                                                      | C <sub>12</sub> H <sub>24</sub> O <sub>3</sub>                 | 10979353  | 2.24       |
| 21   | 30.706 | Ergosta-5,22-dien-3-ol, acetate, (3.β.,22E)-                                     | C <sub>30</sub> H <sub>48</sub> O <sub>2</sub>                 | 3338742.6 | 0.68       |
| 22   | 36.267 | 9,12-Octadecadienoyl chloride, (Z,Z)-                                            | C <sub>18</sub> H <sub>31</sub> ClO                            | 21144347  | 4.32       |
| 23   | 37.187 | trans-13-Octadecenoic acid                                                       | C <sub>18</sub> H <sub>34</sub> O <sub>2</sub>                 | 42737800  | 8.72       |
| 24   | 43.117 | 8,11,14-Eicosatrienoic acid, (Z,Z,Z)-                                            | C <sub>20</sub> H <sub>34</sub> O <sub>2</sub>                 | 15966377  | 3.26       |

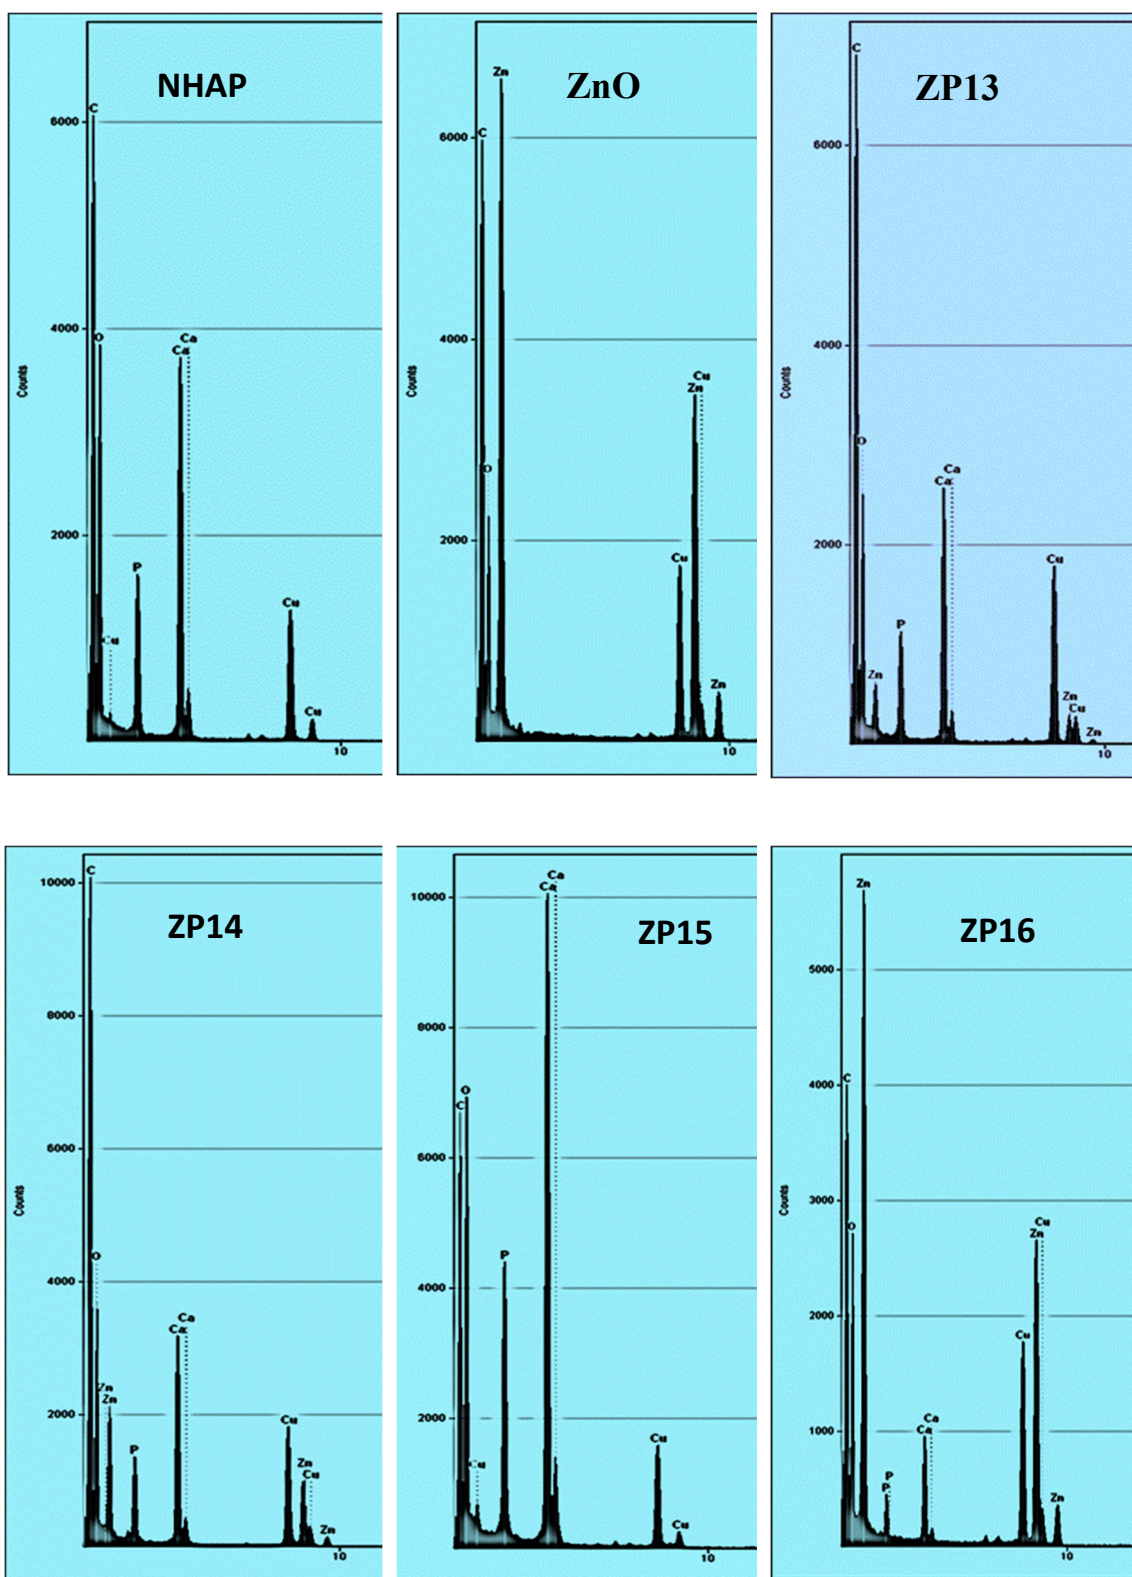

**Figure S1.** EDX elemental microanalysis of NHAP, ZnO and composite nano samples
